# Supplementary material for: Nanostructures based on gold and silica as a delivery platform for enhanced l -DOPA therapy in neurodegenerative disease
Source: Royal Society of Chemistry journal article supplement (doi:10.1039/d5dt02168e), 2025-01-01
Supplement: d5dt02168e1.pdf [file d5dt02168e1.pdf]

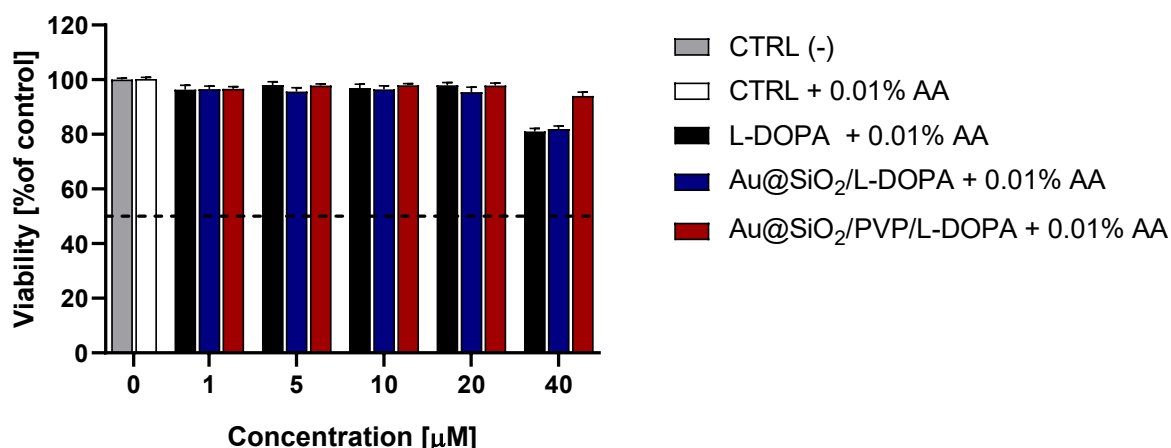

**Figure S1.** Effect of free L-DOPA and Au@SiO<sub>2</sub>-based nanoformulations on SH-SY5Y cell viability after 24 h in the presence of 0.01% ascorbic acid. Cells were exposed to increasing L-DOPA-equivalent concentrations (1–40 μM) delivered as free L-DOPA, Au@SiO<sub>2</sub>–L-DOPA, or Au@SiO<sub>2</sub>/PVP–L-DOPA. Viability was determined by the Trypan Blue exclusion assay and normalized to the untreated control (CTRL (–); medium only). CTRL + AA refers to cells treated with 0.01% ascorbic acid alone. Bars represent mean ± SD (n = 3). The dashed horizontal line at 50% denotes the IC<sub>50</sub> threshold.

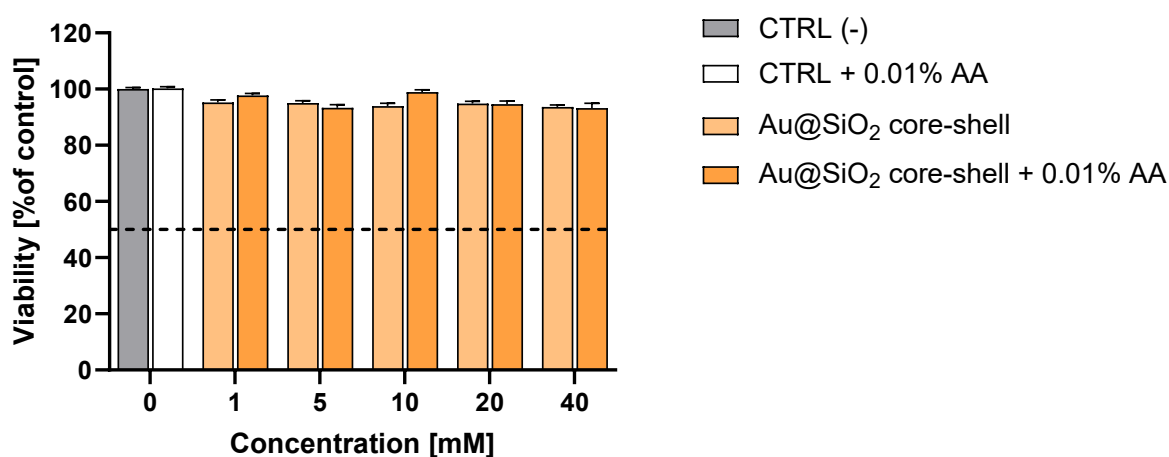

**Figure S2.** Effect of Au@SiO<sub>2</sub> core-shell nanoparticles on SH-SY5Y cell viability after 24 h with or without 0.01% ascorbic acid. Cells were exposed to increasing nanoparticle concentrations (1–40 mM). Viability was determined by the Trypan Blue exclusion assay and normalized to the untreated control (CTRL; medium only). CTRL + 0.01% AA denotes cells treated with ascorbic acid alone. Bars show mean ± SD (n = 3). The dashed horizontal line at 50% indicates the IC<sub>50</sub> threshold.

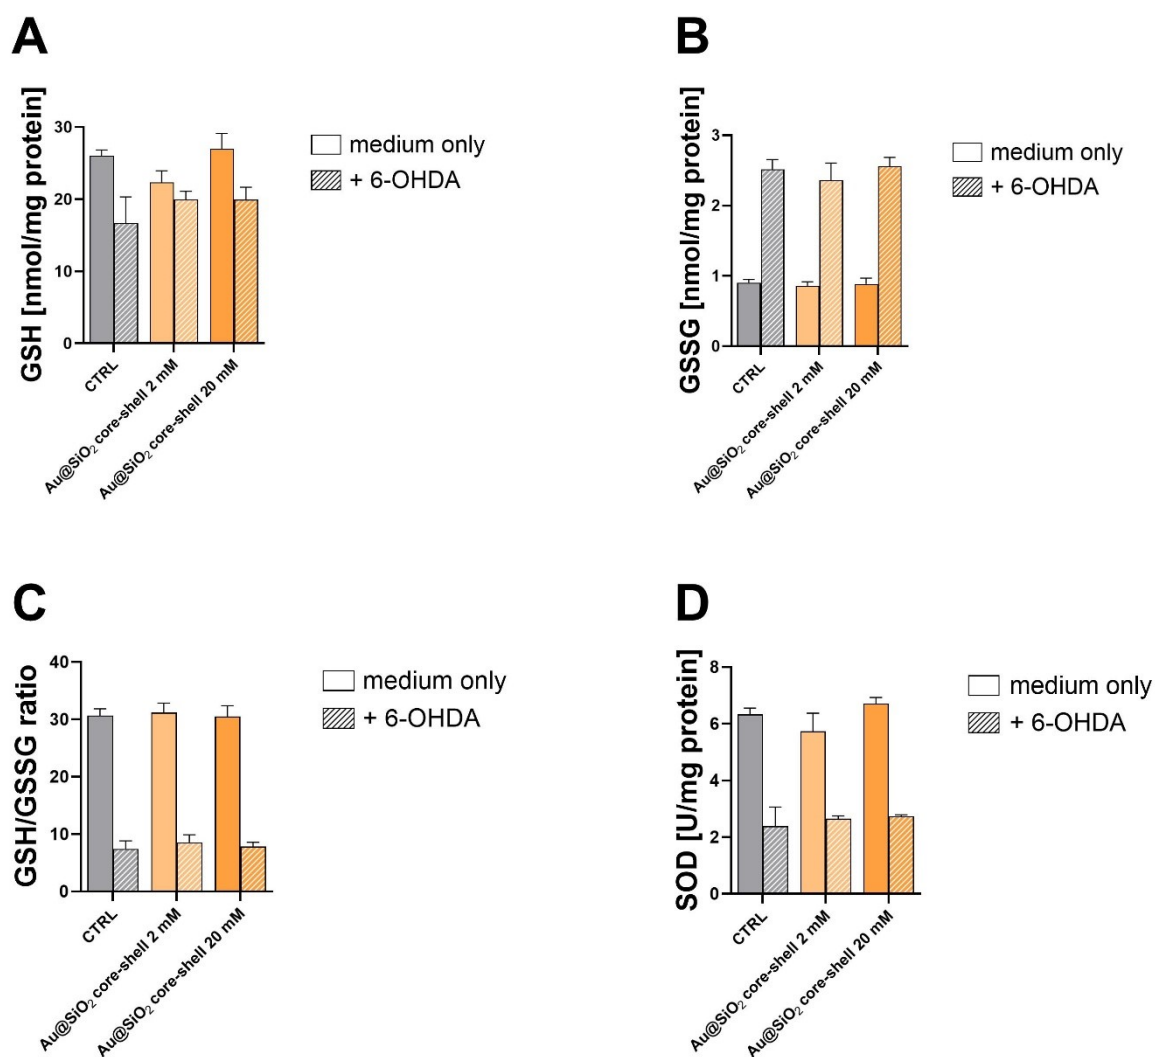

**Figure S3.** Effects of Au@SiO<sub>2</sub> core-shell nanoparticles on the cellular redox state of SH-SY5Y cells in the absence or presence of 6-hydroxydopamine (6-OHDA). Cells were pre-incubated for 2 h with Au@SiO<sub>2</sub> core-shell at 2 or 20 mM, then either maintained in medium alone to a 6 h total or exposed to 50  $\mu$ M 6-OHDA for the final 4 h. Open bars: medium only; hatched bars: +6-OHDA; CTRL: untreated cells. Panels: (A) reduced glutathione (GSH), (B) oxidized glutathione (GSSG), (C) GSH/GSSG ratio, (D) superoxide dismutase (SOD) activity. Data are mean  $\pm$  SD (n = 3).
